# Supplementary material for: S⋯S and S⋯P chalcogen bonding in solution: a cryospectroscopic study of the complexes of 2,2,4,4-tetrafluoro-1,3-dithietane with dimethyl sulfide and trimethylphosphine
Source: Royal Society of Chemistry journal article supplement (doi:10.1039/c8nj01648h), 2018-01-01
Supplement: c8nj01648h1.pdf [file c8nj01648h1.pdf]

# **S··S and S··P chalcogen bonding in solution: A cryospectroscopic study of the complexes of 2,2,4,4-tetrafluoro-1,3-dithietane with dimethyl sulfide and trimethylphosphine.**

Yannick Geboes,<sup>a</sup> Elias De Vos,<sup>a</sup> and Wouter A. Herrebout<sup>a\*</sup>

<sup>a</sup>Department of Chemistry, University of Antwerp, Groenenborgerlaan 171, 2020 Antwerp (Belgium), E-mail: [wouter.herrebout@uantwerpen.be](mailto:wouter.herrebout@uantwerpen.be)

## Electronic supplementary information

**Table S1.1:** Cartesian coordinates of the MP2/aug-cc-pVDZ optimized geometry of 2,2,4,4-Tetrafluoro-1,3-dithiethane (C<sub>2</sub>F<sub>4</sub>S<sub>2</sub>).

| D <sub>2h</sub>                              | X         | Y         | Z         |
|----------------------------------------------|-----------|-----------|-----------|
| C <sub>2</sub> F <sub>4</sub> S <sub>2</sub> |           |           |           |
| S                                            | 0.000000  | 1.387164  | 0.000000  |
| C                                            | 1.191095  | 0.000000  | 0.000000  |
| F                                            | 2.014655  | 0.000000  | 1.085309  |
| F                                            | 2.014655  | 0.000000  | -1.085309 |
| S                                            | 0.000000  | -1.387164 | 0.000000  |
| C                                            | -1.191095 | 0.000000  | 0.000000  |
| F                                            | -2.014655 | 0.000000  | 1.085309  |
| F                                            | -2.014655 | 0.000000  | -1.085309 |

**Table S1.2:** Cartesian coordinates of the MP2/aug-cc-pVDZ optimized geometry of TMP.

| C <sub>3v</sub> | X         | Y         | Z         |
|-----------------|-----------|-----------|-----------|
| TMP             |           |           |           |
| P               | 0.000000  | 0.000000  | 0.618978  |
| C               | 0.000000  | 1.626598  | -0.285498 |
| H               | -0.889964 | 2.208825  | -0.001487 |
| H               | 0.889964  | 2.208825  | -0.001487 |
| H               | 0.000000  | 1.481355  | -1.378927 |
| C               | -1.408675 | -0.813299 | -0.285498 |
| H               | -1.467917 | -1.875144 | -0.001487 |
| H               | -2.357881 | -0.333681 | -0.001487 |
| H               | -1.282891 | -0.740678 | -1.378927 |
| C               | 1.408675  | -0.813299 | -0.285498 |
| H               | 2.357881  | -0.333681 | -0.001487 |
| H               | 1.467917  | -1.875144 | -0.001487 |
| H               | 1.282891  | -0.740678 | -1.378927 |

**Table S1.3:** Cartesian coordinates of the MP2/aug-cc-pVDZ optimized geometry of DMS.

| C <sub>2v</sub> | X         | Y         | Z         |
|-----------------|-----------|-----------|-----------|
| DMS             |           |           |           |
| S               | 0.000000  | 0.674247  | 0.000000  |
| C               | -1.370330 | -0.522675 | 0.000000  |
| H               | -2.309643 | 0.047454  | 0.000000  |
| H               | -1.334542 | -1.152689 | -0.900834 |
| H               | -1.334542 | -1.152688 | 0.900834  |
| C               | 1.370330  | -0.522675 | 0.000000  |
| H               | 1.334542  | -1.152689 | -0.900834 |
| H               | 2.309643  | 0.047454  | 0.000000  |
| H               | 1.334542  | -1.152689 | 0.900834  |

**Table S2.1:** Cartesian coordinates of the MP2/aug-cc-pVDZ optimized geometry of the chalcogen bonded complex between C<sub>2</sub>F<sub>4</sub>S<sub>2</sub> and dimethyl sulfide at the global minimum.

| C <sub>s</sub>                               | X         | Y         | Z         |
|----------------------------------------------|-----------|-----------|-----------|
| C <sub>2</sub> F <sub>4</sub> S <sub>2</sub> |           |           |           |
| S                                            | 0.191356  | -0.733470 | -0.170850 |
| C                                            | 1.998971  | -0.804876 | 0.120000  |
| F                                            | 2.675866  | -1.503257 | -0.838102 |
| F                                            | 2.334294  | -1.398324 | 1.303986  |
| S                                            | 2.355308  | 0.986928  | 0.089336  |
| C                                            | 0.548378  | 1.061456  | -0.190256 |
| F                                            | 0.218467  | 1.672270  | -1.359591 |
| F                                            | -0.104439 | 1.757456  | 0.786727  |
| DMS                                          |           |           |           |
| S                                            | -2.859015 | 0.181457  | -0.363551 |
| C                                            | -3.235859 | -1.581365 | -0.605585 |
| H                                            | -4.248327 | -1.810630 | -0.243224 |
| H                                            | -3.182924 | -1.788818 | -1.683338 |
| H                                            | -2.498517 | -2.208496 | -0.080780 |
| C                                            | -2.998860 | 0.219438  | 1.450564  |
| H                                            | -2.265451 | -0.463617 | 1.904766  |
| H                                            | -2.782994 | 1.245794  | 1.777093  |
| H                                            | -4.017638 | -0.054091 | 1.761016  |

**Table S2.2:** Cartesian coordinates of the MP2/aug-cc-pVDZ optimized geometry of the chalcogen bonded complex between C<sub>2</sub>F<sub>4</sub>S<sub>2</sub> and dimethyl sulfide at the local minimum.

| C <sub>s</sub>                               | X         | Y         | Z         |
|----------------------------------------------|-----------|-----------|-----------|
| C <sub>2</sub> F <sub>4</sub> S <sub>2</sub> |           |           |           |
| S                                            | 0.483353  | -0.877370 | -0.433442 |
| C                                            | 2.251251  | -0.541287 | -0.092591 |
| F                                            | 3.053797  | -0.702704 | -1.184430 |
| F                                            | 2.782383  | -1.350728 | 0.870443  |
| S                                            | 2.105149  | 1.202043  | 0.438060  |
| C                                            | 0.337593  | 0.856257  | 0.124666  |
| F                                            | -0.209630 | 1.690191  | -0.804410 |
| F                                            | -0.432023 | 1.008326  | 1.245986  |
| DMS                                          |           |           |           |
| S                                            | -2.792931 | -0.675882 | -0.586140 |
| C                                            | -3.024137 | -1.291501 | 1.111104  |
| H                                            | -4.092611 | -1.309448 | 1.370344  |
| H                                            | -2.628175 | -2.315927 | 1.148773  |
| H                                            | -2.469421 | -0.664377 | 1.823782  |
| C                                            | -3.475305 | 0.994150  | -0.348929 |
| H                                            | -2.909878 | 1.532429  | 0.424861  |
| H                                            | -3.377866 | 1.529499  | -1.303355 |
| H                                            | -4.538355 | 0.935700  | -0.073858 |

**Table S2.3:** Cartesian coordinates of the MP2/aug-cc-pVDZ optimized geometry of the chalcogen bonded complex between C<sub>2</sub>F<sub>4</sub>S<sub>2</sub> and trimethylphosphine.

| C <sub>s</sub>                               | X         | Y         | Z         |
|----------------------------------------------|-----------|-----------|-----------|
| C <sub>2</sub> F <sub>4</sub> S <sub>2</sub> |           |           |           |
| S                                            | -0.746085 | -0.943557 | -0.171824 |
| C                                            | -0.732578 | 0.878359  | -0.018044 |
| F                                            | -0.185704 | 1.519432  | -1.090931 |
| F                                            | -0.036342 | 1.334175  | 1.068263  |
| S                                            | -2.531490 | 1.164174  | 0.132565  |
| C                                            | -2.550666 | -0.657026 | -0.024279 |
| F                                            | -3.261768 | -1.093164 | -1.105756 |
| F                                            | -3.113856 | -1.280533 | 1.052831  |
| TMP                                          |           |           |           |
| P                                            | 2.558113  | -0.347296 | -0.089767 |
| C                                            | 3.200323  | 1.336227  | -0.535494 |
| H                                            | 3.088853  | 1.499781  | -1.618090 |
| H                                            | 2.609212  | 2.103553  | -0.013508 |
| H                                            | 4.262389  | 1.446135  | -0.259685 |
| C                                            | 3.884403  | -1.394855 | -0.860612 |
| H                                            | 3.746514  | -2.445621 | -0.563728 |
| H                                            | 3.809639  | -1.338031 | -1.957123 |
| H                                            | 4.889070  | -1.062438 | -0.550509 |
| C                                            | 3.103800  | -0.418643 | 1.683307  |
| H                                            | 2.500793  | 0.283101  | 2.279263  |
| H                                            | 2.939954  | -1.431734 | 2.081225  |
| H                                            | 4.170424  | -0.158729 | 1.787862  |

**Table S3:** MP2/aug-cc-pVDZ  $\Delta E(\text{DZ})$  and CCSD(T)/CBS extrapolated complexation energies  $\Delta E(\text{CCSD(T)})$ , calculated vapor phase complexation enthalpies  $\Delta H^\circ(\text{vap,calc})$ , the calculated complexation enthalpies in liquid krypton ( $\Delta H^\circ(\text{LKr,calc})$ ) and the corresponding experimentally obtained complexation enthalpy ( $\Delta H^\circ(\text{LKr})$ ) ( $\text{kJ mol}^{-1}$ ) of the chalcogen bonded complexes between  $\text{C}_2\text{F}_4\text{S}_2$  and dimethyl ether. All data are taken from Reference 36.

| S $\cdots$ O Chalcogen bonded complexes |                |               |
|-----------------------------------------|----------------|---------------|
|                                         | Global Minimum | Local Minimum |
| $\Delta E(\text{DZ})$                   | -23.4          | -22.2         |
| $\Delta E(\text{CCSD(T)})$              | -25.0          | -23.5         |
| $\Delta H^\circ(\text{vap,calc})$       | -22.1          | -20.8         |
| $\Delta H^\circ(\text{LKr,calc})$       | -16.6          | -15.2         |
| Experimental                            |                |               |
| $\Delta H^\circ(\text{LKr})$            | -13.5(1)       |               |

**Table S4:** MP2/aug-cc-pVDZ vibrational frequencies, in  $\text{cm}^{-1}$ , infrared intensities, in  $\text{km mol}^{-1}$ , and Raman intensities, in  $\text{\AA}^4 \text{amu}^{-1}$ , for the chalcogen bonded complex between  $\text{C}_2\text{F}_4\text{S}_2$  and DMS and both monomers, as well as the complexation shift  $\Delta\nu$ .

|                                                    | Monomer   |         |            | Chalcogen bonded complex, global minimum |             |         |            |
|----------------------------------------------------|-----------|---------|------------|------------------------------------------|-------------|---------|------------|
|                                                    | Frequency | IR int. | Raman int. | Frequency                                | $\Delta\nu$ | IR int. | Raman int. |
| <b><math>\text{C}_2\text{F}_4\text{S}_2</math></b> |           |         |            |                                          |             |         |            |
| $\nu_1 (\text{A}_g)$                               | 1160.9    | 0.0     | 8.6        | 1157.0                                   | -4.0        | 5.4     | 7.7        |
| $\nu_2 (\text{A}_g)$                               | 651.0     | 0.0     | 15.5       | 648.1                                    | -2.8        | 1.0     | 20.3       |
| $\nu_3 (\text{A}_g)$                               | 513.3     | 0.0     | 14.7       | 512.0                                    | -1.4        | 1.4     | 33.7       |
| $\nu_4 (\text{A}_g)$                               | 323.4     | 0.0     | 3.0        | 323.9                                    | 0.5         | 0.4     | 3.0        |
| $\nu_5 (\text{A}_u)$                               | 231.2     | 0.0     | 0.0        | 235.0                                    | 3.8         | 0.03    | 0.004      |
| $\nu_6 (\text{B}_{1g})$                            | 839.9     | 0.0     | 8.4        | 835.7                                    | -4.3        | 6.4     | 22.4       |
| $\nu_7 (\text{B}_{1g})$                            | 422.6     | 0.0     | 5.3        | 424.3                                    | 1.7         | 1.4     | 14.9       |
| $\nu_8 (\text{B}_{1u})$                            | 1095.1    | 320.6   | 0.0        | 1088.9                                   | -6.2        | 277.2   | 0.2        |
| $\nu_9 (\text{B}_{1u})$                            | 428.3     | 0.4     | 0.0        | 430.0                                    | 1.7         | 0.3     | 0.0        |
| $\nu_{10} (\text{B}_{1u})$                         | 56.3      | 1.2     | 0.0        | 60.0                                     | 3.7         | 1.0     | 0.1        |
| $\nu_{11} (\text{B}_{2g})$                         | 1079.3    | 0.0     | 4.9        | 1073.8                                   | -5.5        | 106.5   | 3.4        |
| $\nu_{12} (\text{B}_{2g})$                         | 377.9     | 0.0     | 1.3        | 381.8                                    | 3.9         | 0.0     | 1.2        |
| $\nu_{13} (\text{B}_{2u})$                         | 970.0     | 128.0   | 0.0        | 964.7                                    | -5.3        | 139.1   | 5.8        |
| $\nu_{14} (\text{B}_{2u})$                         | 335.3     | 4.5     | 0.0        | 335.8                                    | 0.6         | 8.9     | 1.8        |
| $\nu_{15} (\text{B}_{3g})$                         | 282.2     | 0.0     | 2.1        | 286.6                                    | 4.4         | 0.0008  | 1.9        |
| $\nu_{16} (\text{B}_{3u})$                         | 1065.2    | 732.2   | 0.0        | 1059.3                                   | -5.9        | 562.2   | 3.9        |
| $\nu_{17} (\text{B}_{3u})$                         | 638.7     | 15.9    | 0.0        | 636.3                                    | -2.4        | 8.8     | 5.2        |
| $\nu_{18} (\text{B}_{3u})$                         | 445.4     | 2.1     | 0.0        | 444.5                                    | -0.9        | 5.7     | 3.6        |
| <b>DMS</b>                                         |           |         |            |                                          |             |         |            |
| $\nu_1 (\text{A}_1)$                               | 3186.3    | 9.8     | 92.1       | 3188.4                                   | 2.0         | 4.6     | 73.2       |
| $\nu_2 (\text{A}_1)$                               | 3062.2    | 31.8    | 338.0      | 3059.6                                   | -2.6        | 26.2    | 273.4      |
| $\nu_3 (\text{A}_1)$                               | 1473.5    | 0.3     | 7.6        | 1471.0                                   | -2.5        | 2.9     | 9.1        |
| $\nu_4 (\text{A}_1)$                               | 1352.5    | 0.8     | 0.9        | 1351.6                                   | -0.9        | 0.1     | 7.6        |
| $\nu_5 (\text{A}_1)$                               | 1046.4    | 8.6     | 0.4        | 1047.0                                   | 0.6         | 10.3    | 0.6        |
| $\nu_6 (\text{A}_1)$                               | 713.3     | 2.8     | 22.1       | 711.6                                    | -1.7        | 3.4     | 17.4       |
| $\nu_7 (\text{A}_1)$                               | 260.8     | 0.03    | 3.0        | 262.6                                    | 1.8         | 0.07    | 2.5        |
| $\nu_8 (\text{A}_2)$                               | 3168.0    | 0.0     | 16.5       | 3168.1                                   | 0.0         | 1.9     | 27.9       |
| $\nu_9 (\text{A}_2)$                               | 1450.1    | 0.0     | 10.3       | 1447.6                                   | -2.5        | 0.2     | 9.1        |
| $\nu_{10} (\text{A}_2)$                            | 945.6     | 0.0     | 0.1        | 948.8                                    | 3.2         | 0.007   | 0.5        |
| $\nu_{11} (\text{A}_2)$                            | 171.2     | 0.0     | 0.1        | 174.8                                    | 3.6         | 0.04    | 0.2        |
| $\nu_{12} (\text{B}_1)$                            | 3159.9    | 21.3    | 119.4      | 3159.5                                   | -0.4        | 18.9    | 107.3      |
| $\nu_{13} (\text{B}_1)$                            | 1462.5    | 12.9    | 0.02       | 1460.2                                   | -2.3        | 12.2    | 0.6        |
| $\nu_{14} (\text{B}_1)$                            | 982.7     | 4.1     | 0.006      | 984.8                                    | 2.1         | 8.6     | 0.8        |
| $\nu_{15} (\text{B}_1)$                            | 187.1     | 0.8     | 0.09       | 192.0                                    | 4.9         | 2.1     | 0.5        |
| $\nu_{16} (\text{B}_2)$                            | 3187.4    | 3.4     | 42.0       | 3192.5                                   | 5.1         | 2.8     | 44.8       |
| $\nu_{17} (\text{B}_2)$                            | 3066.9    | 26.3    | 2.8        | 3065.3                                   | -1.6        | 18.9    | 45.3       |
| $\nu_{18} (\text{B}_2)$                            | 1464.2    | 13.6    | 0.03       | 1461.2                                   | -3.0        | 10.5    | 0.4        |
| $\nu_{19} (\text{B}_2)$                            | 1326.0    | 6.5     | 0.1        | 1325.5                                   | -0.4        | 3.4     | 0.2        |
| $\nu_{20} (\text{B}_2)$                            | 912.7     | 0.2     | 0.2        | 915.1                                    | 2.4         | 0.2     | 0.2        |
| $\nu_{21} (\text{B}_2)$                            | 765.1     | 0.1     | 8.5        | 763.1                                    | -1.9        | 0.5     | 6.9        |

Van der Waals vibrations:  $22.3 \text{ cm}^{-1}$ ,  $0.8 \text{ km mol}^{-1}$ ,  $0.5 \text{ \AA}^4 \text{amu}^{-1}$ ,  $40.4 \text{ cm}^{-1}$ ,  $0.7 \text{ km mol}^{-1}$ ,  $0.4 \text{ \AA}^4 \text{amu}^{-1}$ ,  $53.6 \text{ cm}^{-1}$ ,  $0.1 \text{ km mol}^{-1}$ ,  $0.3 \text{ \AA}^4 \text{amu}^{-1}$ ,  $71.7 \text{ cm}^{-1}$ ,  $1.2 \text{ km mol}^{-1}$ ,  $1.5 \text{ \AA}^4 \text{amu}^{-1}$ ,  $89.6 \text{ cm}^{-1}$ ,  $0.03 \text{ km mol}^{-1}$ ,  $1.4 \text{ \AA}^4 \text{amu}^{-1}$ ,  $122.3 \text{ cm}^{-1}$ ,  $11.2 \text{ km mol}^{-1}$ ,  $4.6 \text{ \AA}^4 \text{amu}^{-1}$ .

**Table S5:** MP2/aug-cc-pVDZ vibrational frequencies, in  $\text{cm}^{-1}$ , infrared intensities, in  $\text{km mol}^{-1}$ , and Raman intensities, in  $\text{\AA}^4 \text{amu}^{-1}$ , for the chalcogen bonded complex between  $\text{C}_2\text{F}_4\text{S}_2$  and DMS and both monomers, as well as the complexation shift  $\Delta\nu$ .

|                                  | Monomer   |         |            | Chalcogen bonded complex, local minimum |             |         |            |
|----------------------------------|-----------|---------|------------|-----------------------------------------|-------------|---------|------------|
|                                  | Frequency | IR int. | Raman int. | Frequency                               | $\Delta\nu$ | IR int. | Raman int. |
| $\text{C}_2\text{F}_4\text{S}_2$ |           |         |            |                                         |             |         |            |
| $\nu_1 (\text{A}_g)$             | 1160.9    | 0.0     | 8.6        | 1155.4                                  | -5.5        | 6.6     | 6.8        |
| $\nu_2 (\text{A}_g)$             | 651.0     | 0.0     | 15.5       | 647.7                                   | -3.3        | 0.7     | 20.6       |
| $\nu_3 (\text{A}_g)$             | 513.3     | 0.0     | 14.7       | 512.5                                   | -0.8        | 0.8     | 27.6       |
| $\nu_4 (\text{A}_g)$             | 323.4     | 0.0     | 3.0        | 324.5                                   | 1.1         | 0.4     | 3.5        |
| $\nu_5 (\text{A}_u)$             | 231.2     | 0.0     | 0.0        | 235.6                                   | 4.4         | 0.03    | 0.02       |
| $\nu_6 (\text{B}_{1g})$          | 839.9     | 0.0     | 8.4        | 837.8                                   | -2.2        | 6.2     | 23.3       |
| $\nu_7 (\text{B}_{1g})$          | 422.6     | 0.0     | 5.3        | 423.9                                   | 1.3         | 0.8     | 13.5       |
| $\nu_8 (\text{B}_{1u})$          | 1095.1    | 320.6   | 0.0        | 1084.0                                  | -11.1       | 274.8   | 0.4        |
| $\nu_9 (\text{B}_{1u})$          | 428.3     | 0.4     | 0.0        | 430.1                                   | 1.8         | 0.4     | 0.02       |
| $\nu_{10} (\text{B}_{1u})$       | 56.3      | 1.2     | 0.0        | 64.7                                    | 8.4         | 1.1     | 0.06       |
| $\nu_{11} (\text{B}_{2g})$       | 1079.3    | 0.0     | 4.9        | 1069.6                                  | -9.7        | 161.7   | 3.3        |
| $\nu_{12} (\text{B}_{2g})$       | 377.9     | 0.0     | 1.3        | 381.8                                   | 3.9         | 0.07    | 1.1        |
| $\nu_{13} (\text{B}_{2u})$       | 970.0     | 128.0   | 0.0        | 966.7                                   | -3.3        | 133.4   | 2.9        |
| $\nu_{14} (\text{B}_{2u})$       | 335.3     | 4.5     | 0.0        | 335.9                                   | 0.7         | 8.1     | 0.9        |
| $\nu_{15} (\text{B}_{3g})$       | 282.2     | 0.0     | 2.1        | 286.4                                   | 4.2         | 0.006   | 1.8        |
| $\nu_{16} (\text{B}_{3u})$       | 1065.2    | 732.2   | 0.0        | 1055.6                                  | -9.7        | 542.8   | 3.3        |
| $\nu_{17} (\text{B}_{3u})$       | 638.7     | 15.9    | 0.0        | 636.4                                   | -2.3        | 9.6     | 3.4        |
| $\nu_{18} (\text{B}_{3u})$       | 445.4     | 2.1     | 0.0        | 444.9                                   | -0.5        | 6.0     | 2.4        |
| DMS                              |           |         |            |                                         |             |         |            |
| $\nu_1 (\text{A}_1)$             | 3186.3    | 9.8     | 92.1       | 3188.3                                  | 2.0         | 5.3     | 57.8       |
| $\nu_2 (\text{A}_1)$             | 3062.2    | 31.8    | 338.0      | 3066.4                                  | 4.2         | 26.0    | 305.9      |
| $\nu_3 (\text{A}_1)$             | 1473.5    | 0.3     | 7.6        | 1472.5                                  | -1.0        | 1.7     | 7.8        |
| $\nu_4 (\text{A}_1)$             | 1352.5    | 0.8     | 0.9        | 1351.7                                  | -0.8        | 0.9     | 4.9        |
| $\nu_5 (\text{A}_1)$             | 1046.4    | 8.6     | 0.4        | 1046.9                                  | 0.6         | 15.6    | 0.9        |
| $\nu_6 (\text{A}_1)$             | 713.3     | 2.8     | 22.1       | 710.8                                   | -2.5        | 3.8     | 19.0       |
| $\nu_7 (\text{A}_1)$             | 260.8     | 0.03    | 3.0        | 261.6                                   | 0.8         | 0.02    | 2.5        |
| $\nu_8 (\text{A}_2)$             | 3168.0    | 0.0     | 16.5       | 3176.4                                  | 8.4         | 0.3     | 18.7       |
| $\nu_9 (\text{A}_2)$             | 1450.1    | 0.0     | 10.3       | 1448.3                                  | -1.8        | 0.4     | 9.5        |
| $\nu_{10} (\text{A}_2)$          | 945.6     | 0.0     | 0.1        | 948.7                                   | 3.1         | 0.07    | 0.4        |
| $\nu_{11} (\text{A}_2)$          | 171.2     | 0.0     | 0.1        | 172.9                                   | 1.7         | 0.1     | 0.2        |
| $\nu_{12} (\text{B}_1)$          | 3159.9    | 21.3    | 119.4      | 3169.4                                  | 9.5         | 14.5    | 121.5      |
| $\nu_{13} (\text{B}_1)$          | 1462.5    | 12.9    | 0.02       | 1461.0                                  | -1.6        | 14.1    | 0.3        |
| $\nu_{14} (\text{B}_1)$          | 982.7     | 4.1     | 0.006      | 985.6                                   | 3.0         | 14.0    | 0.04       |
| $\nu_{15} (\text{B}_1)$          | 187.1     | 0.8     | 0.09       | 186.0                                   | -1.1        | 1.5     | 0.4        |
| $\nu_{16} (\text{B}_2)$          | 3187.4    | 3.4     | 42.0       | 3192.0                                  | 4.6         | 3.2     | 49.3       |
| $\nu_{17} (\text{B}_2)$          | 3066.9    | 26.3    | 2.8        | 3071.1                                  | 4.2         | 20.4    | 28.3       |
| $\nu_{18} (\text{B}_2)$          | 1464.2    | 13.6    | 0.03       | 1462.5                                  | -1.6        | 10.0    | 0.1        |
| $\nu_{19} (\text{B}_2)$          | 1326.0    | 6.5     | 0.1        | 1325.1                                  | -0.9        | 4.1     | 0.2        |
| $\nu_{20} (\text{B}_2)$          | 912.7     | 0.2     | 0.2        | 915.3                                   | 2.5         | 0.2     | 0.3        |
| $\nu_{21} (\text{B}_2)$          | 765.1     | 0.1     | 8.5        | 763.4                                   | -1.7        | 0.5     | 7.3        |

Van der Waals vibrations: 23.2  $\text{cm}^{-1}$ , 0.5  $\text{km mol}^{-1}$ , 0.2  $\text{\AA}^4 \text{amu}^{-1}$ , 44.7  $\text{cm}^{-1}$ , 0.1  $\text{km mol}^{-1}$ , 0.8  $\text{\AA}^4 \text{amu}^{-1}$ , 61.9  $\text{cm}^{-1}$ , 1.1  $\text{km mol}^{-1}$ , 0.9  $\text{\AA}^4 \text{amu}^{-1}$ , 71.2  $\text{cm}^{-1}$ , 0.5  $\text{km mol}^{-1}$ , 1.0  $\text{\AA}^4 \text{amu}^{-1}$ , 83.0  $\text{cm}^{-1}$ , 0.6  $\text{km mol}^{-1}$ , 1.5  $\text{\AA}^4 \text{amu}^{-1}$ , 103.9  $\text{cm}^{-1}$ , 7.9  $\text{km mol}^{-1}$ , 1.5  $\text{\AA}^4 \text{amu}^{-1}$ .

**Table S6:** MP2/aug-cc-pVDZ vibrational frequencies, in  $\text{cm}^{-1}$ , infrared intensities, in  $\text{km mol}^{-1}$ , and Raman intensities, in  $\text{\AA}^4 \text{amu}^{-1}$ , for the chalcogen bonded complex between  $\text{C}_2\text{F}_4\text{S}_2$  and TMP and both monomers, as well as the complexation shift  $\Delta\nu$ .

|                                  | Monomer   |         |            | Chalcogen bonded complex |             |         |            |
|----------------------------------|-----------|---------|------------|--------------------------|-------------|---------|------------|
|                                  | Frequency | IR int. | Raman int. | Frequency                | $\Delta\nu$ | IR int. | Raman int. |
| $\text{C}_2\text{F}_4\text{S}_2$ |           |         |            |                          |             |         |            |
| $\nu_1 (\text{A}_g)$             | 1160.9    | 0.0     | 8.6        | 1153.5                   | -7.4        | 6.9     | 7.1        |
| $\nu_2 (\text{A}_g)$             | 651.0     | 0.0     | 15.5       | 646.6                    | -4.3        | 1.5     | 23.7       |
| $\nu_3 (\text{A}_g)$             | 513.3     | 0.0     | 14.7       | 511.2                    | -2.1        | 1.2     | 37.4       |
| $\nu_4 (\text{A}_g)$             | 323.4     | 0.0     | 3.0        | 323.9                    | 0.5         | 0.8     | 4.5        |
| $\nu_5 (\text{A}_u)$             | 231.2     | 0.0     | 0.0        | 235.5                    | 4.3         | 0.04    | 0.04       |
| $\nu_6 (\text{B}_{1g})$          | 839.9     | 0.0     | 8.4        | 836.8                    | -3.1        | 10.2    | 31.7       |
| $\nu_7 (\text{B}_{1g})$          | 422.6     | 0.0     | 5.3        | 423.5                    | 0.9         | 1.2     | 19.2       |
| $\nu_8 (\text{B}_{1u})$          | 1095.1    | 320.6   | 0.0        | 1081.6                   | -13.6       | 275.2   | 0.4        |
| $\nu_9 (\text{B}_{1u})$          | 428.3     | 0.4     | 0.0        | 429.8                    | 1.5         | 0.3     | 0.0        |
| $\nu_{10} (\text{B}_{1u})$       | 56.3      | 1.2     | 0.0        | 60.8                     | 4.5         | 0.9     | 0.1        |
| $\nu_{11} (\text{B}_{2g})$       | 1079.3    | 0.0     | 4.9        | 1065.7                   | -13.6       | 120.1   | 4.6        |
| $\nu_{12} (\text{B}_{2g})$       | 377.9     | 0.0     | 1.3        | 381.8                    | 3.9         | 0.1     | 0.9        |
| $\nu_{13} (\text{B}_{2u})$       | 970.0     | 128.0   | 0.0        | 966.8                    | -3.2        | 84.8    | 20.3       |
| $\nu_{14} (\text{B}_{2u})$       | 335.3     | 4.5     | 0.0        | 334.9                    | -0.4        | 9.6     | 2.2        |
| $\nu_{15} (\text{B}_{3g})$       | 282.2     | 0.0     | 2.1        | 286.6                    | 4.4         | 0.009   | 1.8        |
| $\nu_{16} (\text{B}_{3u})$       | 1065.2    | 732.2   | 0.0        | 1054.9                   | -10.4       | 594.9   | 8.1        |
| $\nu_{17} (\text{B}_{3u})$       | 638.7     | 15.9    | 0.0        | 635.2                    | -3.5        | 8.1     | 7.5        |
| $\nu_{18} (\text{B}_{3u})$       | 445.4     | 2.1     | 0.0        | 444.0                    | -1.4        | 7.3     | 4.8        |
| TMP                              |           |         |            |                          |             |         |            |
| $\nu_1 (\text{A}_1)$             | 3148.5    | 33.6    | 160.8      | 3152.0                   | 3.5         | 26.9    | 175.0      |
| $\nu_2 (\text{A}_1)$             | 3043.5    | 29.4    | 528.4      | 3046.7                   | 3.1         | 38.5    | 556.7      |
| $\nu_3 (\text{A}_1)$             | 1469.0    | 9.2     | 1.5        | 1467.7                   | -1.3        | 7.5     | 1.4        |
| $\nu_4 (\text{A}_1)$             | 1314.7    | 5.1     | 7.3        | 1315.0                   | 0.3         | 3.2     | 14.3       |
| $\nu_5 (\text{A}_1)$             | 957.8     | 20.1    | 5.0        | 957.2                    | -0.7        | 106.2   | 13.9       |
| $\nu_6 (\text{A}_1)$             | 660.9     | 0.5     | 26.5       | 662.8                    | 1.9         | 0.7     | 25.5       |
| $\nu_7 (\text{A}_1)$             | 287.5     | 1.0     | 1.5        | 287.2                    | -0.4        | 1.3     | 1.2        |
| $\nu_8 (\text{A}_2)$             | 3168.1    | 0.0     | 0.0        | 3171.1                   | 3.0         | 2.9     | 30.0       |
| $\nu_9 (\text{A}_2)$             | 1440.1    | 0.0     | 0.0        | 1439.0                   | -1.1        | 0.02    | 0.2        |
| $\nu_{10} (\text{A}_2)$          | 776.6     | 0.0     | 0.0        | 779.8                    | 3.2         | 0.002   | 0.006      |
| $\nu_{11} (\text{A}_2)$          | 164.1     | 0.0     | 0.0        | 164.7                    | 0.6         | 0.002   | 0.008      |
| $\nu_{12} (\text{E})$            | 3167.9    | 11.5    | 95.9       | 3172.3                   | 4.4         | 6.5     | 63.1       |
| $\nu_{13} (\text{E})$            | 3149.3    | 3.0     | 18.4       | 3153.5                   | 4.2         | 4.4     | 35.6       |
| $\nu_{14} (\text{E})$            | 3046.9    | 16.7    | 4.2        | 3050.0                   | 3.1         | 12.9    | 16.8       |
| $\nu_{15} (\text{E})$            | 1456.7    | 8.7     | 3.0        | 1455.6                   | -1.1        | 8.5     | 3.6        |
| $\nu_{16} (\text{E})$            | 1446.2    | 3.1     | 9.5        | 1445.0                   | -1.2        | 2.2     | 8.4        |
| $\nu_{17} (\text{E})$            | 1290.0    | 2.3     | 0.7        | 1290.4                   | 0.5         | 3.1     | 0.6        |
| $\nu_{18} (\text{E})$            | 946.6     | 16.5    | 0.5        | 949.0                    | 2.5         | 14.0    | 0.5        |
| $\nu_{19} (\text{E})$            | 831.0     | 0.2     | 0.3        | 832.7                    | 1.8         | 0.6     | 1.9        |
| $\nu_{20} (\text{E})$            | 718.3     | 11.6    | 11.8       | 725.3                    | 7.0         | 9.2     | 12.6       |
| $\nu_{21} (\text{E})$            | 249.8     | 0.2     | 2.8        | 246.3                    | -3.5        | 0.3     | 2.5        |
| $\nu_{22} (\text{E})$            | 207.4     | 0.0009  | 0.6        | 207.3                    | 0.0         | 0.004   | 0.4        |

Van der Waals vibrations: 16.5  $\text{cm}^{-1}$ , 0.05  $\text{km mol}^{-1}$ , 0.2  $\text{\AA}^4 \text{amu}^{-1}$ , 24.6  $\text{cm}^{-1}$ , 0.3  $\text{km mol}^{-1}$ , 0.4  $\text{\AA}^4 \text{amu}^{-1}$ , 39.3  $\text{cm}^{-1}$ , 1.4  $\text{km mol}^{-1}$ , 0.6  $\text{\AA}^4 \text{amu}^{-1}$ , 59.4  $\text{cm}^{-1}$ , 0.6  $\text{km mol}^{-1}$ , 2.0  $\text{\AA}^4 \text{amu}^{-1}$ , 72.7  $\text{cm}^{-1}$ , 0.2  $\text{km mol}^{-1}$ , 0.5  $\text{\AA}^4 \text{amu}^{-1}$ , 80.0  $\text{cm}^{-1}$ , 0.1  $\text{km mol}^{-1}$ , 1.9  $\text{\AA}^4 \text{amu}^{-1}$ .



**Table S7:** Overview of the different van 't Hoff plots constructed for the chalcogen bonded complex between C<sub>2</sub>F<sub>4</sub>S<sub>2</sub> and DME in LKr in the 121-155 K temperature interval, showing the estimated mole fractions of each monomer, range of the integrated monomer and complex bands and complex enthalpies  $\Delta H^\circ$  (LKr).

| $x_{C_2F_4S_2}$      | $x_{DMS}$            | Integrated C <sub>2</sub> F <sub>4</sub> S <sub>2</sub><br>band (cm <sup>-1</sup> ) | Integrated DMS<br>band (cm <sup>-1</sup> ) | Integrated Complex<br>band (cm <sup>-1</sup> ) | $\Delta H^\circ$ (LKr) <sup>a</sup> |
|----------------------|----------------------|-------------------------------------------------------------------------------------|--------------------------------------------|------------------------------------------------|-------------------------------------|
| $9.4 \times 10^{-5}$ | $1.9 \times 10^{-3}$ | 1125-1058                                                                           | 1345-1290                                  | 1073.2-1055                                    | -12.97(8)                           |
| $9.4 \times 10^{-5}$ | $1.9 \times 10^{-3}$ | 970.5-950.3                                                                         | 1080-945                                   | 965-950                                        | -12.4(1)                            |
| $3.8 \times 10^{-5}$ | $1.4 \times 10^{-3}$ | 1125-1096.7                                                                         | 998-952                                    | 1073-1055                                      | -12.0(1)                            |
| $3.8 \times 10^{-5}$ | $1.4 \times 10^{-3}$ | 973-950.5                                                                           | 1053-1006                                  | 962-953.5                                      | -12.5(1)                            |
| $1.9 \times 10^{-3}$ | $1.1 \times 10^{-3}$ | 968.5-952                                                                           | 1065-1002                                  | 963.5-952                                      | -12.5(3)                            |
| $1.9 \times 10^{-4}$ | $5.6 \times 10^{-4}$ | 1127-1096.8                                                                         | 1480-1395                                  | 966-951                                        | -11.7(2)                            |
| $1.9 \times 10^{-4}$ | $5.6 \times 10^{-4}$ | 974-950.2                                                                           | 3025-2815                                  | 1111-1094.5                                    | -12.00(4)                           |

<sup>a</sup> Values are given with the standard deviation of the linear regression in parentheses.

**Table S8:** Overview of the different van 't Hoff plots constructed for the chalcogen bonded complex between C<sub>2</sub>F<sub>4</sub>S<sub>2</sub> and TMP in LKr in the 121-155 K temperature interval, showing the estimated mole fractions of each monomer, range of the integrated monomer and complex bands and complex enthalpies  $\Delta H^\circ$  (LKr).

| $x_{C_2F_4S_2}$      | $x_{DMS}$            | Integrated C <sub>2</sub> F <sub>4</sub> S <sub>2</sub><br>band (cm <sup>-1</sup> ) | Integrated TMP<br>band (cm <sup>-1</sup> ) | Integrated Complex<br>band (cm <sup>-1</sup> ) | $\Delta H^\circ$ (LKr) <sup>a</sup> |
|----------------------|----------------------|-------------------------------------------------------------------------------------|--------------------------------------------|------------------------------------------------|-------------------------------------|
| $1.9 \times 10^{-4}$ | $1.9 \times 10^{-3}$ | 1122-1096.5                                                                         | 3010-2930.5                                | 964-943.4                                      | -13.1(1)                            |
| $2.8 \times 10^{-5}$ | $1.1 \times 10^{-3}$ | 970-952                                                                             | 3010-2930.5                                | 1120-1040                                      | -12.85(5)                           |
| $9.4 \times 10^{-5}$ | $1.0 \times 10^{-3}$ | 1127-1096.8                                                                         | 3010-2930.5                                | 1112-1076.8                                    | -12.73(4)                           |
| $9.4 \times 10^{-5}$ | $1.0 \times 10^{-3}$ | 970-952                                                                             | 1460-1400                                  | 963-943                                        | -12.96(6)                           |
| $1.9 \times 10^{-5}$ | $1.1 \times 10^{-3}$ | 1127-1096.8                                                                         | 1330-1260                                  | 1112.5-1051.7                                  | -12.54(8)                           |
| $3.8 \times 10^{-4}$ | $5.6 \times 10^{-4}$ | 659.7-644.1                                                                         | 1460-1400                                  | 1441-1413                                      | -13.82(5)                           |

<sup>a</sup> Values are given with the standard deviation of the linear regression in parentheses.

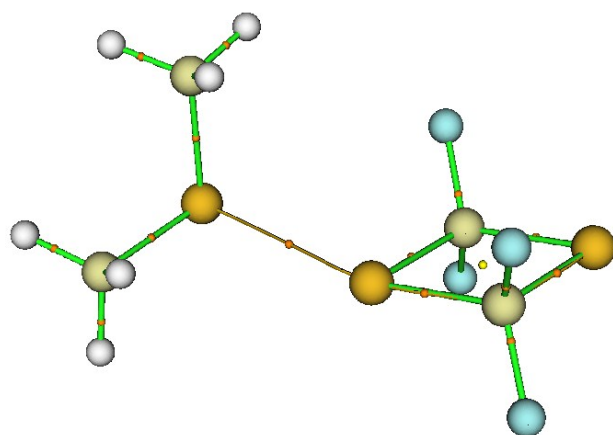

electron densities, in a.u., at the bond critical point : S...S 0.0155

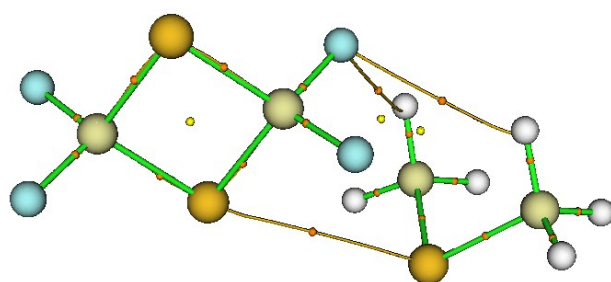

electron densities, in a.u., at the bond critical points : S...S 0.0129  
F...H 0.0046  
F...H 0.0051

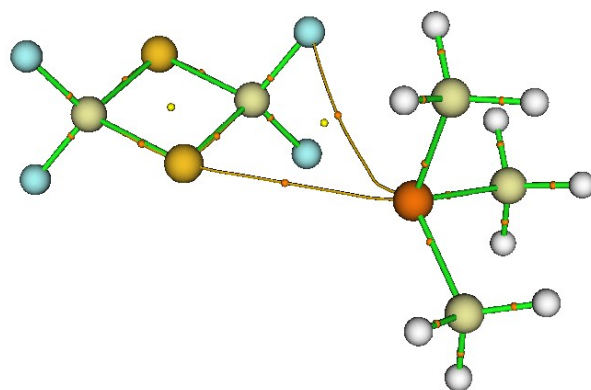

electron densities, in a.u., at the bond critical points : S...P 0.0131  
F...P 0.0068

**Figure S1.** Bond critical points (orange), ring critical points (yellow) and bond paths for the complexes of  $C_2F_4S_2$  with dimethyl sulfide and trimethylphosphine. All results are obtained using the MP2/aug-cc-pVDZ electron density.

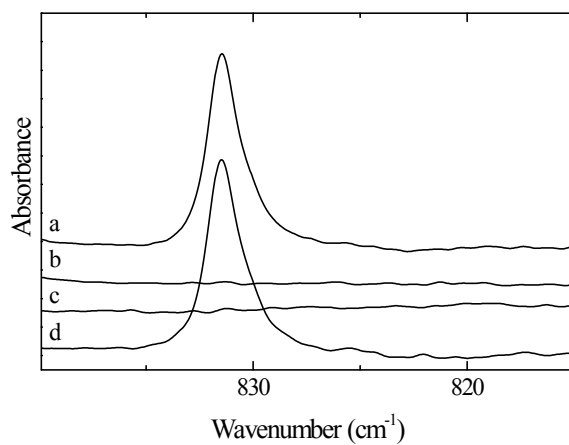

**Figure S2:** Infrared spectra of the  $C_2F_4S_2$   $\nu_6$  spectral region for the mixtures of  $C_2F_4S_2$  with TMP- $d_9$  dissolved in LKr at 133 K. In each panel, trace *a* represents the mixed solution, while traces *b* and *c* show the rescaled spectra of the solutions containing only  $C_2F_4S_2$  or TMP- $d_9$ , respectively. Trace *d* represents the spectrum of the complex which is obtained by subtracting the rescaled traces *b* and *c* from trace *a*. Estimated mole fractions of the solutions of the mixture are  $3.8 \times 10^{-4}$  for  $C_2F_4S_2$  and  $9.4 \times 10^{-4}$  for TMP- $d_9$ .
